# Supplementary material for: Potent “Clicked” MMP2 Inhibitors: Synthesis, Molecular Modeling and Biological Exploration
Source: Royal Society of Chemistry journal article supplement (doi:10.1039/c0ob00852d), 2011-01-01

# Potent “Clicked” MMP2 Inhibitors: Synthesis, Molecular Modeling and Biological Exploration

Jose María Zapico,<sup>a</sup> Pilar Serra,<sup>a</sup> Josune García-Sanmartín,<sup>b</sup> Kamila Filipiak,<sup>a,c</sup> Rodrigo J. Carbajo,<sup>d</sup> Anne K. Schott,<sup>d</sup> Antonio Pineda-Lucena,<sup>d</sup> Alfredo Martínez,<sup>b</sup> Sonsoles Martín-Santamaría,<sup>a</sup> Beatriz de Pascual-Teresa,<sup>\*a</sup> Ana Ramos.<sup>\*a</sup>

<sup>a</sup> Departamento de Química, Facultad de Farmacia, Universidad San Pablo CEU, Urbanización Montepríncipe, 28668 Boadilla del Monte, Madrid, Spain. Phone: (+34)913724724, Fax: (+34)913510496 E-mail: [bpaster@ceu.es](mailto:bpaster@ceu.es); [aramgon@ceu.es](mailto:aramgon@ceu.es);

<sup>b</sup> Center for Biomedical Research of La Rioja (CIBIR) C/ Piqueras 98, 26006 Logroño, Spain.

<sup>c</sup> Department of Molecular Biology, Faculty of Mathematics and Natural Sciences, The John Paul II Catholic University of Lublin, 20-718 Lublin, Poland.

<sup>d</sup> Structural Biology Laboratory, Medicinal Chemistry Department, Centro de Investigación Príncipe Felipe, Avda. Autopista del Saler, 16,46012 Valencia, Spain

Table of Contents:

|   |                                                                                                                                                                                                                                                      | Pages |
|---|------------------------------------------------------------------------------------------------------------------------------------------------------------------------------------------------------------------------------------------------------|-------|
| 1 | IR, $\delta_H$ and $\delta_C$ NMR, MS (ESI) and microanalysis data of compounds <b>14-22</b>                                                                                                                                                         | S2-S5 |
| 2 | <b>Figure 1S.</b> Evolution of the root-mean-square deviations (RMSD) of the C $\alpha$ atoms of MMP-2, in complex with compound <b>18</b> , with respect to the initial structure (pink) and the NMR structure (blue) along the 3-ns MD simulation. | S6-S7 |
| 3 | <b>Figure 2S.</b> Evolution of the root-mean-square deviations (RMSD) of the C $\alpha$ atoms of MMP-2, in complex with compound <b>19</b> , with respect to the initial structure (pink) and the NMR structure (blue) along the 3-ns MD simulation. |       |
| 4 | <b>Figure 3S.</b> Evolution of the distances with Zn ion involving hydroxamate oxygens of compound <b>18</b> (CO-Zn distance in blue; HO-Zn distance in pink) along the 3-ns MD simulation.                                                          |       |
| 5 | <b>Figure 4S.</b> Evolution of the distances with Zn ion involving hydroxamate oxygens of compound <b>19</b> (CO-Zn distance in blue; HO-Zn distance in pink) along the 3-ns MD simulation.                                                          |       |

IR,  $\delta_H$  and  $\delta_C$  NMR, MS (ESI) and microanalysis data of compounds **14-22**

**N-Hydroxy-4-({4-[4-(4-methylphenyl)-1H-1,2,3-triazole-1-yl]phenyl)sulfonyl}tetrahydro-2H-pyran-4-carboxamide (**14**).** (Found: C, 55.20; H, 5.23; N, 11.76; S, 6.76. C<sub>21</sub>H<sub>22</sub>N<sub>4</sub>O<sub>5</sub>S·H<sub>2</sub>O requires C, 54.77; H, 5.25; N, 12.17; S, 6.96%);  $\nu_{\max}$  (KBr)/ cm<sup>-1</sup> 3477, 3139, 1653;  $\delta_H$  (DMSO-*d*<sub>6</sub>) 1.98 (2H, td, *J* 13.4, 4.3, 2CHH), 2.26 (2H, d, *J* 13.4, 2CHH), 2.36 (3H, s, CH<sub>3</sub>), 3.17 (2H, t, *J* 11.6, 2OCHH), 3.91 (2H, dd, *J* 11.6 and 3.7, 2OCHH), 7.34 (2H, d, *J* 7.9, ArH), 7.86 (2H, d, *J* 7.9, ArH), 7.97 (2H, d, *J* 9.2, ArH), 8.23 (2H, d, *J* 9.2, ArH),

9.30 (1H, br s, NH), 9.45 (1H, s, Triazole-H) 11.08 (1H, s, OH); n.o.e. H<sub>9,45</sub> → H<sub>8,23</sub>, 2.4%; → H<sub>7,86</sub>, 3.0%; δ<sub>C</sub> (DMSO-*d*<sub>6</sub>) 20.8, 27.3, 63.9, 69.7, 119.3, 119.9, 125.4, 127.0, 129.6, 132.1, 134.1, 138.0, 140.5, 147.9, 160.4; MS (ESI): *m/z* 443.17 [M+H]<sup>+</sup>.

***N*-Hydroxy-4-({4-[4-(4-pentylphenyl)-1*H*-1,2,3-triazole-1-yl]phenyl}sulfonyl)tetrahydro-2*H*-pyran-4-carboxamide (15).** (Found: C, 58.69; H, 6.10; N, 10.37; S, 5.94. C<sub>25</sub>H<sub>30</sub>N<sub>4</sub>O<sub>5</sub>S·H<sub>2</sub>O requires C, 58.12; H, 6.24; N, 10.85; S, 6.21%); ν<sub>max</sub> (KBr)/ cm<sup>-1</sup> 3152, 1651; δ<sub>H</sub> (DMSO-*d*<sub>6</sub>) 0.87 (3H, t, *J* 6.7, CH<sub>3</sub>), 1.23-1.31 (4H, m, 2CH<sub>2</sub>), 1.58-1.63 (2H, m, CH<sub>2</sub>), 2.00 (2H, td, *J* 12.8 and 3.7, 2CHH), 2.25 (2H, d, *J* 12.8, 2CHH), 2.62 (2H, t, *J* 7.3 H, CH<sub>2</sub>Ar), 3.18 (2H, t, *J* 11.0, 2OCHH), 3.90 (2H, dd, *J* 11.0 and 3.0, 2OCHH), 7.34 (2H, d, *J* 8.0, ArH), 7.87 (2H, d, *J* 8.0, ArH), 7.98 (2H, d, *J* 8.5, ArH), 8.23 (2H, d, *J* 8.5, ArH), 9.25 (1H, br s, NH), 9.45 (1H, s, Triazole-H), 11.05 (1H, s, OH); δ<sub>C</sub> (DMSO-*d*<sub>6</sub>) 14.1, 22.1, 27.4, 30.7, 31.0, 35.0, 64.0, 69.6, 119.5, 120.0, 125.6, 127.4, 129.1, 132.3, 134.1, 140.6, 143.1, 148.0, 160.4; MS (ESI): *m/z* 499.22 [M+H]<sup>+</sup>.

***N*-Hydroxy-4-({4-[4-(4-pentylbenzyl)-1*H*-1,2,3-triazole-1-yl]phenyl}sulfonyl)tetrahydro-2*H*-pyran-4-carboxamide (16).** (Found: C, 60.04; H, 6.31; N, 10.36; S, 5.86. C<sub>26</sub>H<sub>32</sub>N<sub>4</sub>O<sub>5</sub>S·0.5H<sub>2</sub>O requires C, 59.87; H, 6.38; N, 10.74; S, 6.15%); ν<sub>max</sub> (KBr)/ cm<sup>-1</sup> 3152, 1655; δ<sub>H</sub> (DMSO-*d*<sub>6</sub>) 0.85 (3H, br s, CH<sub>3</sub>), 1.27 (4H, br s, 2CH<sub>2</sub>), 1.52 (2H, br s, CH<sub>2</sub>CH<sub>2</sub>Ar), 1.90-2.05 (2H, m, 2CHH), 2.24 (2H, d, *J* 12.8, 2CHH), 2.45-2.50 (2H, hidden by DMSO, CH<sub>2</sub>CH<sub>2</sub>Ar), 3.16 (2H, t, *J* 11.6, 2OCHH), 3.86-3.92 (2H, m, 2OCHH), 4.07 (2H, s, ArCH<sub>2</sub>Ar'), 7.13 (2H, d, *J* 7.2, ArH), 7.19 (2H, d, *J* 7.2, ArH), 7.91 (2H, d, *J* 7.9, ArH), 8.17 (2H, d, *J* 7.9, ArH), 8.80 (1H, s, Triazole-H), 9.27 (1H, br s, NH), 11.08 (1H, s, OH); δ<sub>C</sub> (DMSO-*d*<sub>6</sub>) 14.1, 22.1, 27.4, 30.9, 31.0, 34.9, 64.0, 69.6, 119.9, 121.2, 128.6, 132.3, 133.8, 136.3, 140.5, 140.7, 148.2, 160.5; MS (ESI): *m/z* 513.27 [M+H]<sup>+</sup>.

***N*-Hydroxy-4-([4-(4-phenyl-1*H*-1,2,3-triazole-1-yl)phenyl]sulfonyl)tetrahydro-2*H*-pyran-4-carboxamide (17).** (Found: C, 53.85; H, 4.84; N, 12.23; S, 7.04. C<sub>20</sub>H<sub>20</sub>N<sub>4</sub>O<sub>5</sub>S·H<sub>2</sub>O requires C, 53.80; H, 4.97; N, 12.55; S, 7.18%); ν<sub>max</sub> (KBr)/ cm<sup>-1</sup> 3218, 1667; δ<sub>H</sub> (DMSO-*d*<sub>6</sub>) 1.98 (2H, td, *J* 12.8, 2CHH), 2.25 (2H, d, *J* 12.8, 2CHH), 3.17 (2H, t, *J* 11.6, 2OCHH), 3.91 (2H, dd, *J* 11.6 and 3.1, 2OCHH), 7.42 (1H, t, ArH), 7.53 (2H, t, ArH), 7.96-8.00 (4H, m, ArH), 8.24 (2H, d, *J* 8.6, ArH), 9.35 (1H, br s, NH), 9.51 (1H, s, Triazole-H), 11.05 (1H, s, OH); δ<sub>C</sub> (DMSO-*d*<sub>6</sub>) 27.3, 63.8, 69.6, 119.7, 119.8, 125.4, 128.4, 128.9, 129.8, 132.1, 134.3, 140.4, 147.8, 160.2; MS (ESI): *m/z* 429.14 [M+H]<sup>+</sup>.

***N*-Hydroxy-4-([4-(4-biphenyl-4-yl-1*H*-1,2,3-triazole-1-yl)phenyl]sulfonyl)tetrahydro-2*H*-pyran-4-carboxamide (18).** (Found: C, 60.30; H, 4.86; N, 10.49; S, 6.03. C<sub>26</sub>H<sub>24</sub>N<sub>4</sub>O<sub>5</sub>S·H<sub>2</sub>O requires C, 59.76; H, 5.01; N, 10.72; S, 6.14 %); ν<sub>max</sub> (KBr)/ cm<sup>-1</sup> 3224, 1667; δ<sub>H</sub> (DMSO-*d*<sub>6</sub>) 1.96-2.03 (2H, m, 2CHH), 2.26 (2H, d, *J* 13.4, 2CHH), 3.18 (2H, t, *J* 11.6, 2OCHH), 3.89-3.93 (2H, m, 2OCHH), 7.38-7.43 (1H, m, ArH), 7.48-7.53 (2H, m, ArH), 7.76 (2H, *J* 7.3, ArH), 7.85 (2H, *J* 8.5, ArH), 7.99 (2H, d, *J* 8.5, ArH), 8.07 (2H, d, *J* 8.5, ArH), 8.27 (2H, d, *J* 8.5, ArH), 9.32 (1H, br s, NH), 9.58 (1H, s, Triazole-H), 11.11 (1H, s, OH); δ<sub>C</sub> (DMSO-*d*<sub>6</sub>) 27.3, 63.9, 69.6, 120.0, 120.2, 126.0, 126.6, 127.4, 127.8, 128.9, 129.1, 132.3, 134.0, 139.5, 140.2, 140.5, 147.5, 160.5; MS (ESI): *m/z* 505.16 [M+H]<sup>+</sup>.

***N*-Hydroxy-4-({4-[4-(4-methoxyphenyl)-1*H*-1,2,3-triazole-1-yl]phenyl}sulfonyl)tetrahydro-2*H*-pyran-4-carboxamide (19).** (Found: C, 54.31; H, 4.88; N, 11.80; S, 6.76. C<sub>21</sub>H<sub>22</sub>N<sub>4</sub>O<sub>6</sub>S·0.5H<sub>2</sub>O requires C, 53.95; H, 4.96; N, 11.98; S, 6.86%); ν<sub>max</sub> (KBr)/ cm<sup>-1</sup> 3223, 1690, 1666; δ<sub>H</sub> (DMSO-*d*<sub>6</sub>) 1.98 (2H, td, *J* 12.8, 4.3, 2CHH), 2.26 (2H, d, *J* 12.8 Hz, 2CHH), 3.17 (2H, t, *J* 11.6 Hz, 2OCHH), 3.91 (2H,

dd,  $J$  11.6 and 3.7, 2OCHH), 7.09 (2H, d,  $J$  9.2, ArH), 7.90 (2H, d,  $J$  9.2, ArH), 7.98 (2H,  $J$  9.2, ArH), 8.23 (2H, d,  $J$  9.2, ArH), 9.23 (1H, br s, NH), 9.49 (1H, s, Triazole-H), 11.10 (1H, s, OH);  $\delta_C$  (DMSO- $d_6$ ) 27.3, 55.3, 63.9, 69.6, 114.6, 118.8, 119.8, 122.4, 126.9, 132.3, 133.8, 140.6, 147.8, 159.6, 160.5; MS (ESI):  $m/z$  459.15 [M+H]<sup>+</sup>.

**4-[[4-(4-Butyl-1H-1,2,3-triazole-1-yl)phenyl]sulfonyl]-N-hydroxytetrahydro-2H-pyran-4-carboxamide (20).** (Found: C, 51.42; H, 6.03; N, 12.85; S, 7.33. C<sub>18</sub>H<sub>24</sub>N<sub>4</sub>O<sub>5</sub>S·0.9H<sub>2</sub>O required C, 50.91; H, 6.12; N, 13.19; S, 7.55 %);  $\nu_{\max}$  (KBr)/ cm<sup>-1</sup> 3191, 1659;  $\delta_H$  (DMSO- $d_6$ ) 0.92 (3H, t,  $J$  7.3, CH<sub>3</sub>), 1.33-1.41 (2H, m, CH<sub>2</sub>), 1.61-1.71 (m, 2H, CH<sub>2</sub>), 1.96 (2H, td,  $J$  12.8 and 3.7, 2CHH), 2.24 (2H, d,  $J$  12.8, 2CHH), 2.73 (2H, t,  $J$  7.9, CH<sub>2</sub>Ar), 3.16 (2H, t,  $J$  11.6 H, 2OCHH), 3.89 (2H, dd,  $J$  11.6 and 3.0, 2OCHH), 7.92 (2H, d,  $J$  8.6, ArH), 8.17 (2H, d,  $J$  8.6, ArH), 8.79 (s, 1H, Triazole-H) 9.27 (1H, br s, NH), 11.04 (1H, s, OH);  $\delta_C$  (DMSO- $d_6$ ) 13.7, 21.6, 24.6, 27.2, 30.8, 63.9, 69.5, 119.6, 120.4, 132.1, 133.6, 140.6, 148.8, 160.3; MS (ESI):  $m/z$  409.17 [M+H]<sup>+</sup>.

**N-Hydroxy-4-[[4-[(phenylsulfonyl)carbamoylamino)methyl]-1H-1,2,3-triazole-1-yl]phenyl]sulfonyl]-tetrahydro-2H-pyran-4-carboxamide (21).** (Found: C, 44.77; H, 4.46; N, 13.51; S, 9.97. C<sub>22</sub>H<sub>24</sub>N<sub>6</sub>O<sub>8</sub>S<sub>2</sub>·2H<sub>2</sub>O requires C, 43.99; H, 4.70; N, 13.99; S, 10.68 %);  $\nu_{\max}$  (KBr)/ cm<sup>-1</sup> 3301, 1671;  $\delta_H$  (DMSO- $d_6$ ) 1.97 (2H, td,  $J$  12.8 and 4.3, 2CHH), 2.24 (2H, d,  $J$  12.8, 2CHH), 3.17 (2H, t,  $J$  11.6, 2OCHH), 3.89 (2H, dd,  $J$  11.6 and 3.7, 2OCHH), 4.26 (2H, d,  $J$  4.9 Hz, CONHCH<sub>2</sub>), 6.78 (1H, br s, NHCONHCH<sub>2</sub>), 7.45-7.48 (3H, m, ArH), 7.82 (2H, d,  $J$  6.7, ArH), 7.92 (2H, d,  $J$  8.5, ArH), 8.14 (2H, d,  $J$  8.5, ArH), 8.63 (1H, s, Triazole-H), 9.34 (1H, br s, NHOH), 11.10 (1H, br s, OH);  $\delta_C$  (DMSO- $d_6$ ) 27.3, 34.9, 64.0, 69.6, 120.0, 121.5, 127.3, 129.1, 132.3, 133.2, 133.9, 140.5, 146.5, 152.0, 160.5; MS (ESI):  $m/z$  565.18 [M+H]<sup>+</sup>.

**N-Hydroxy-4-[[4-(4-phenoxybenzyl)-1H-1,2,3-triazole-1-yl]phenyl]sulfonyl]tetrahydro-2H-pyran-4-carboxamide (22).** (Found: C, 59.47; H, 4.98; N, 9.85; S, 5.58. C<sub>27</sub>H<sub>26</sub>N<sub>4</sub>O<sub>6</sub>S·0.8H<sub>2</sub>O requires C, 59.07; H, 5.07; N, 10.21; S, 5.84 %);  $\nu_{\max}$  (KBr)/ cm<sup>-1</sup> 3148, 1654;  $\delta_H$  (DMSO- $d_6$ ) 1.97 (2H, td,  $J$  12.8 and 4.9, 2CHH), 2.24 (2H, d,  $J$  12.8, 2CHH), 3.16 (2H, t,  $J$  12.0, 2OCHH), 3.89 (2H, dd,  $J$  12.0 and 3.7, 2OCHH), 4.12 (2H, s, ArCH<sub>2</sub>Ar'), 6.96-7.00 (4H, m, ArH), 7.12 (1H, t,  $J$  7.3, ArH), 7.32-7.40 (4H, m, ArH), 7.92 (2H, d,  $J$  8.6, Ph), 8.20 (2H, d,  $J$  8.6, Ph), 8.82 (1H, s, Triazole-H), 9.28 (1H, br s, NH) 11.07 (1H, br s, OH);  $\delta_C$  (DMSO- $d_6$ ) 27.4, 30.5, 64.0, 69.6, 118.5, 119.1, 120.0, 121.3, 123.5, 130.2, 130.3, 132.3, 133.8, 134.3, 140.7, 148.1, 155.2, 157.0, 160.5; MS (ESI):  $m/z$  535.24 [M+H]<sup>+</sup>.

**Figure 1S.** Evolution of the root-mean-square deviations (RMSD) of the C $\alpha$  atoms of MMP2, in complex with compound **18**, with respect to the initial structure (pink) and the NMR structure (blue) (1hov, model1) along the 3-ns MD simulation.

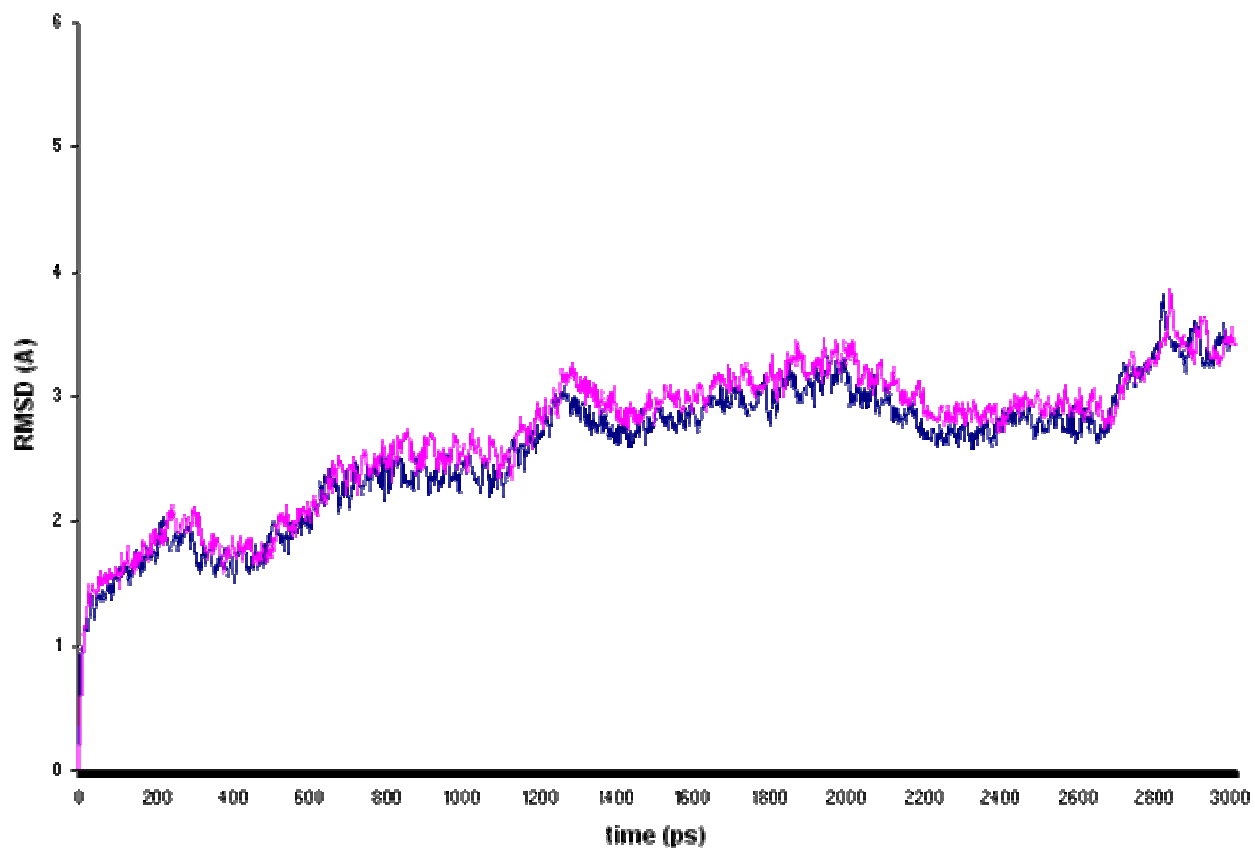

**Figure 2S.** Evolution of the root-mean-square deviations (RMSD) of the C $\alpha$  atoms of MMP2, in complex with compound **19**, with respect to the initial structure (pink) and the NMR structure (blue) along the 3-ns MD simulation.

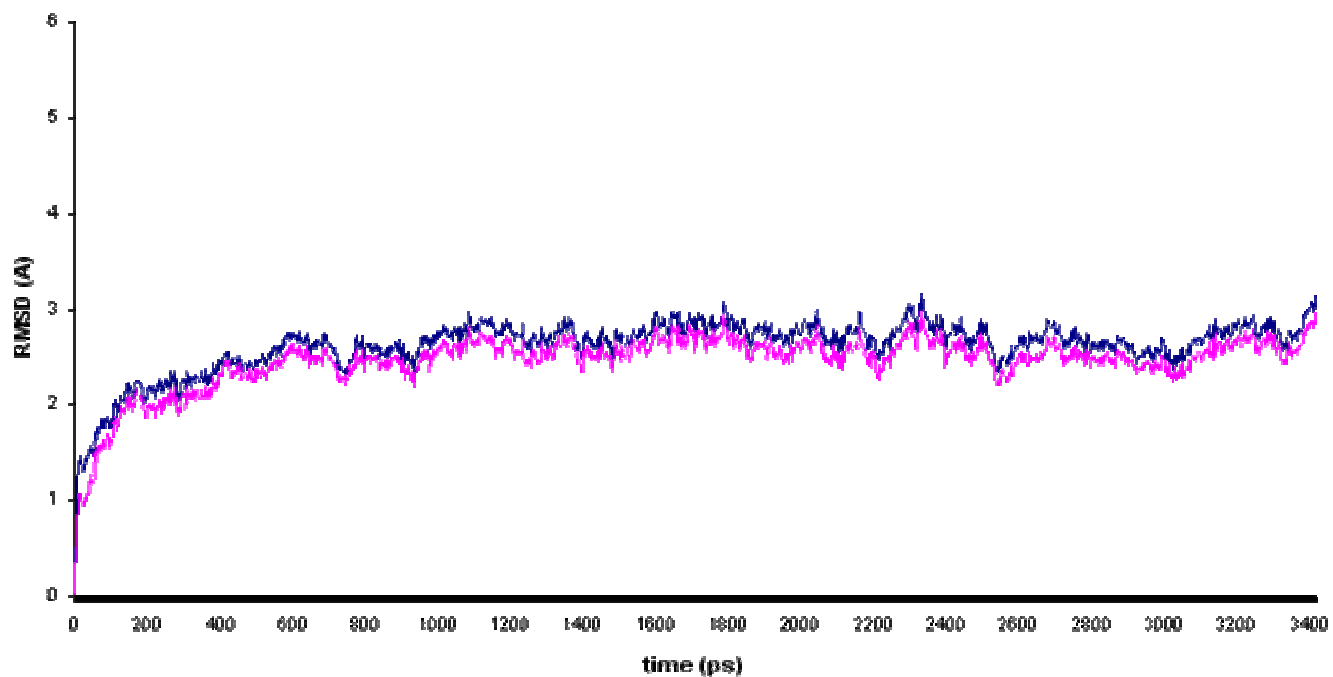

**Figure 3S.** Evolution of the distances with Zn ion involving hydroxamate oxygens of compound **18** (CO-Zn distance in blue; HO-Zn distance in pink) along the 3-ns MD simulation.

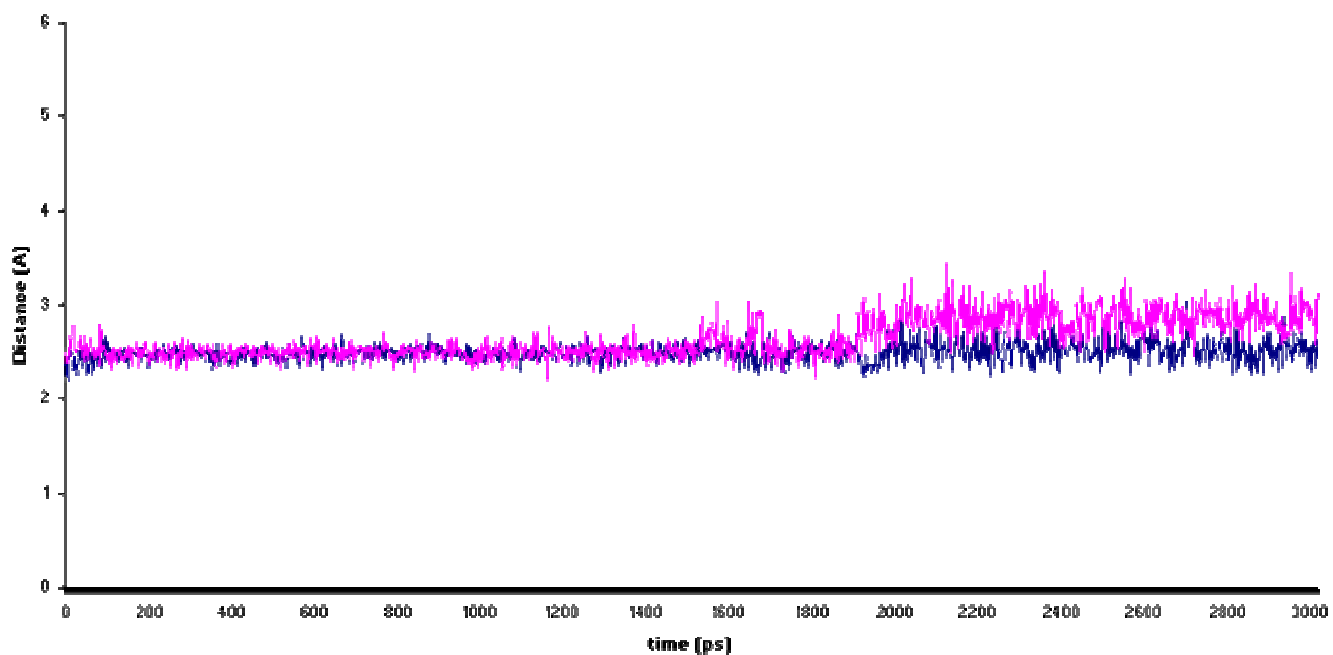

**Figure 4S.** Evolution of the distances with Zn ion involving hydroxamate oxygens of compound **19** (CO-Zn distance in blue; HO-Zn distance in pink) along the 3-ns MD simulation.

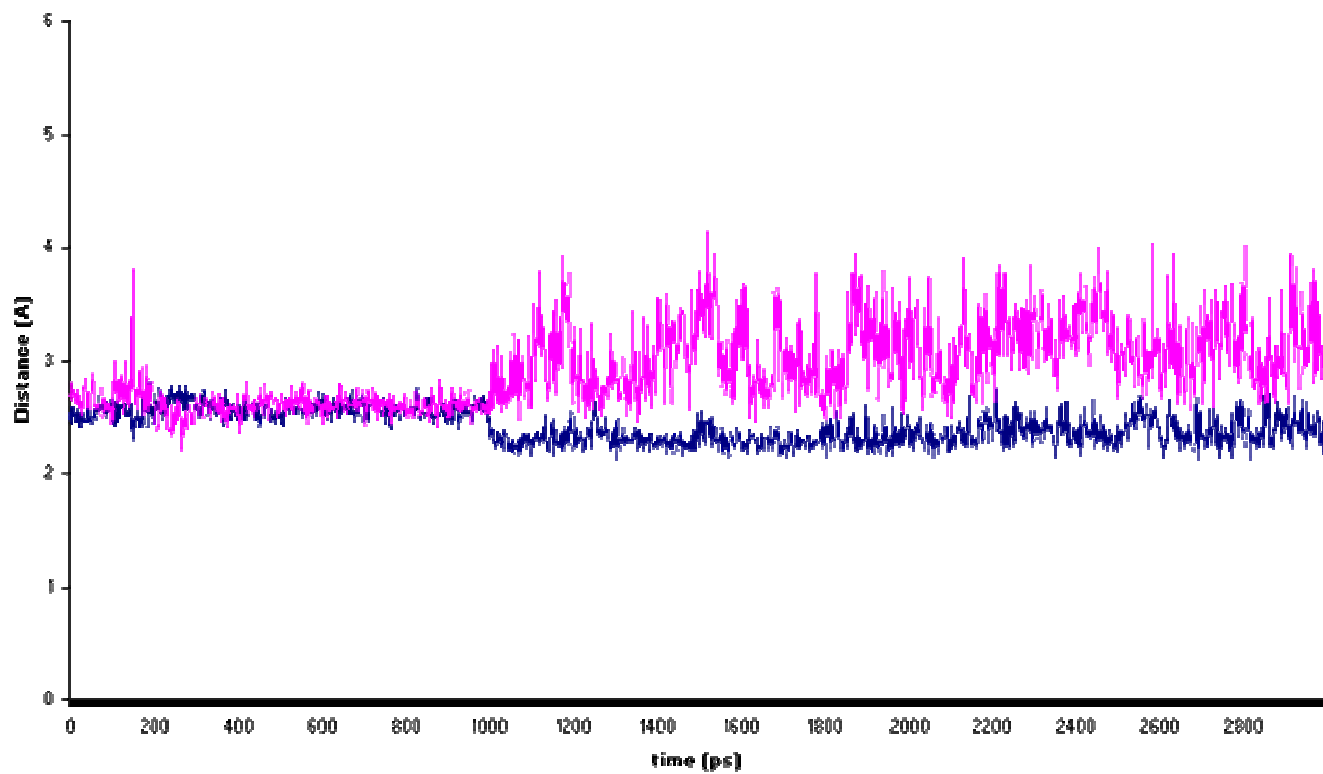

Supplement: c0ob00852d.pdf [file c0ob00852d.pdf]
